# Supplementary material for: Machine Learning for Opportunistic Screening for Osteoporosis from CT Scans of the Wrist and Forearm
Source: MDPI journal article supplement (doi:10.3390/diagnostics12030691), 2022-03-11
Supplement: s1 [file s1]

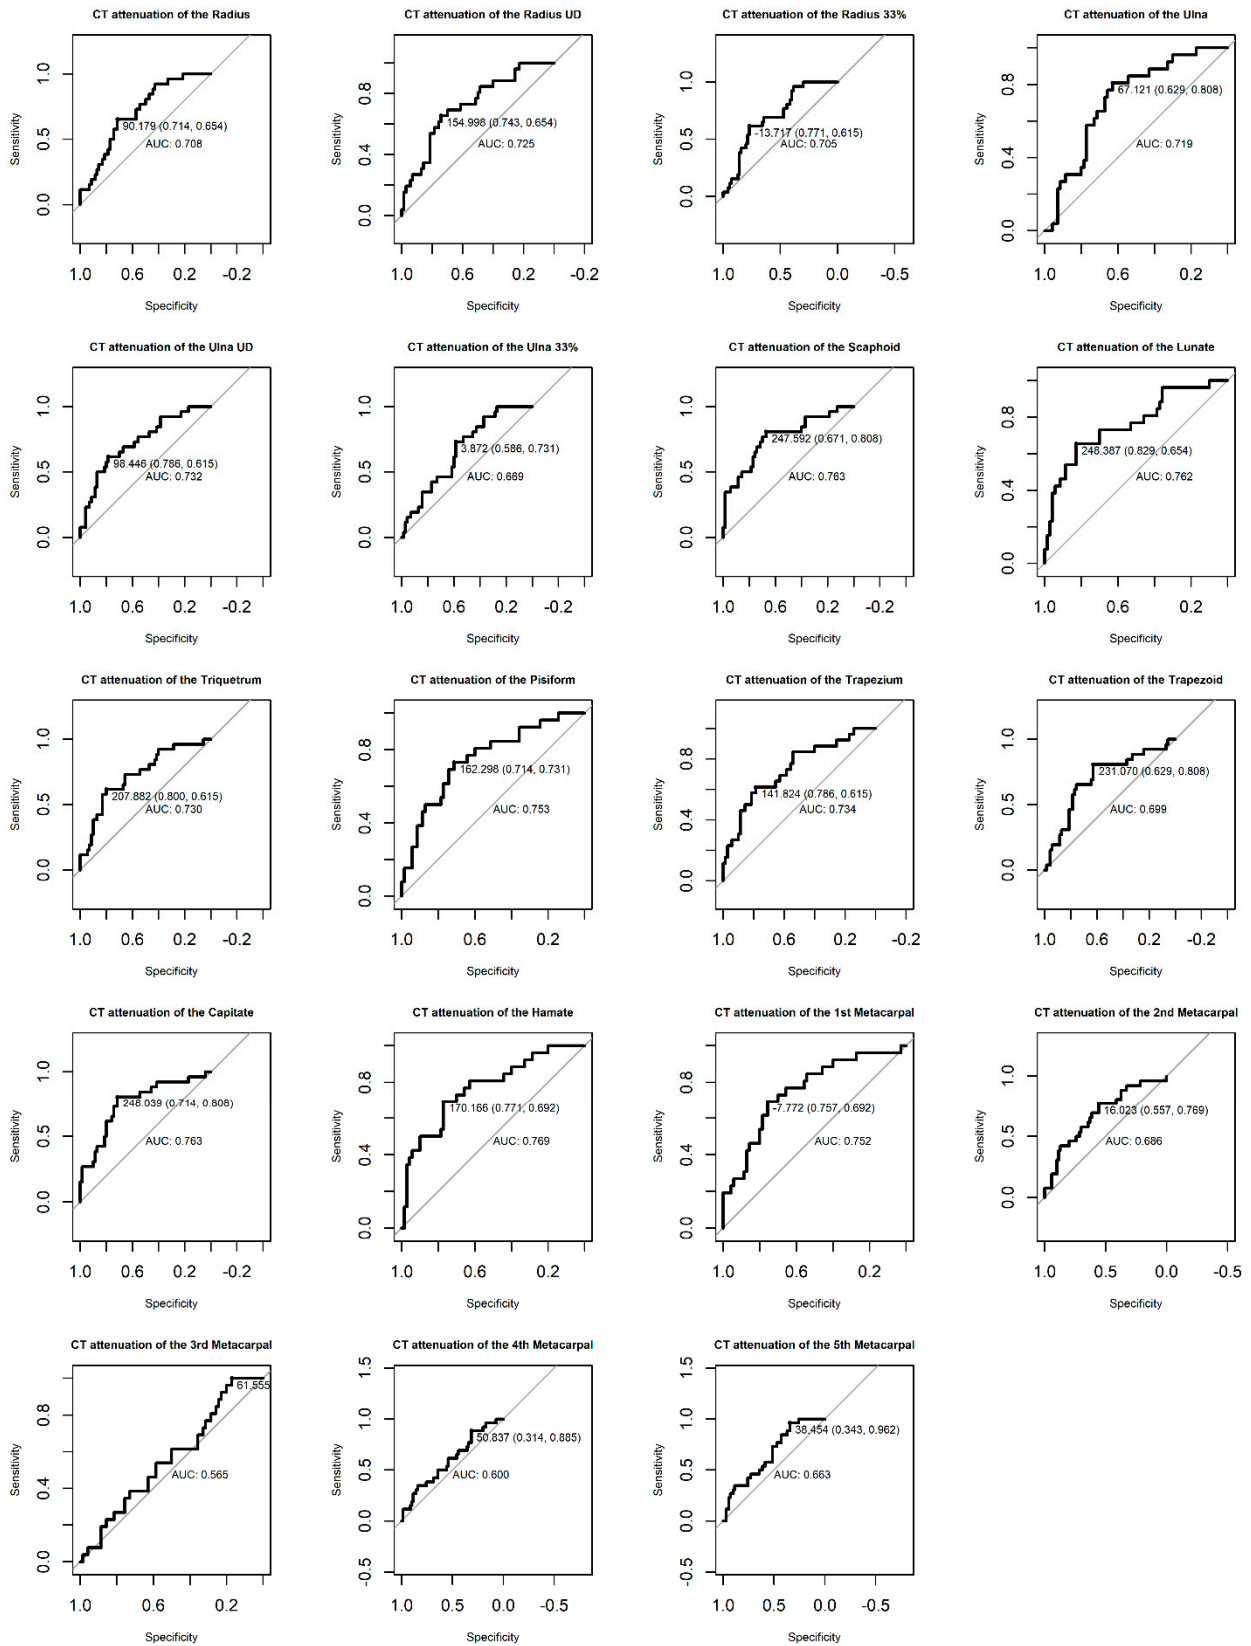

**Figure S1.** Performance of the CT attenuation of each bone and multivariable machine learning models to predict osteoporosis.

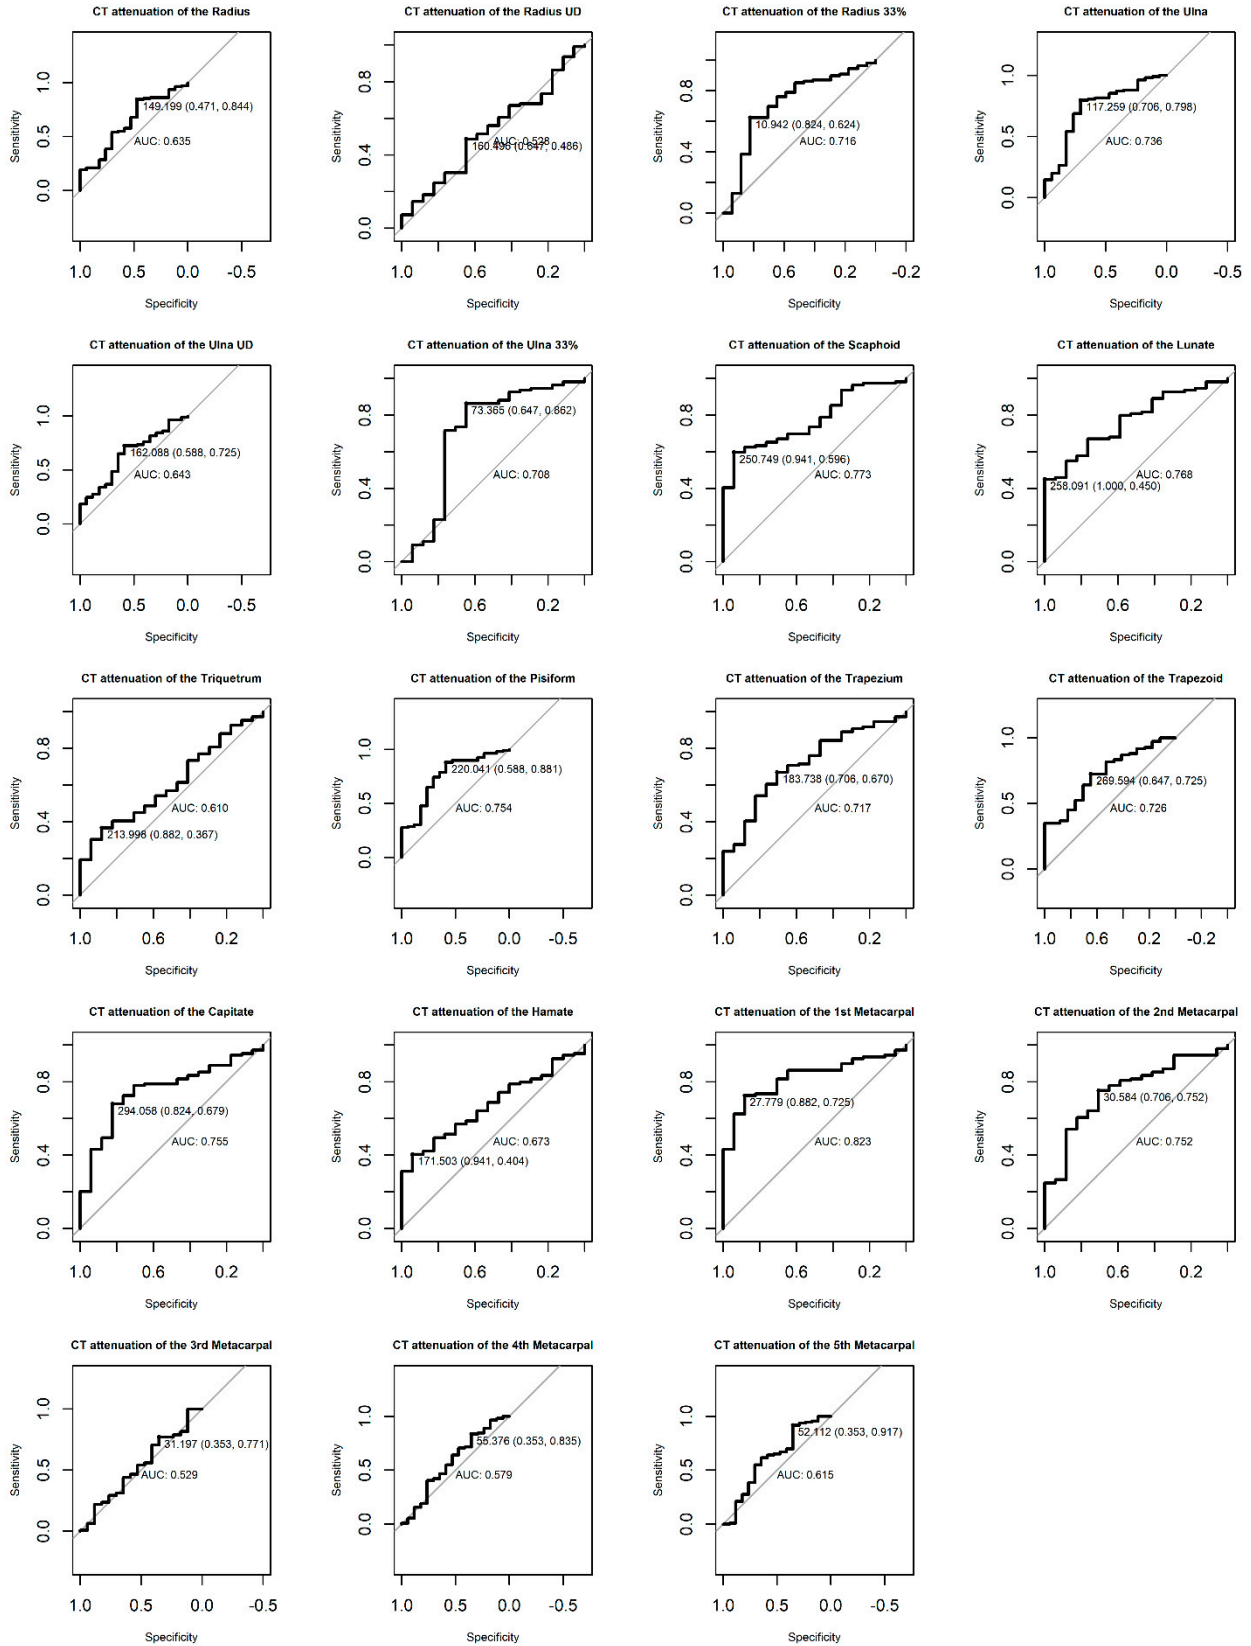

**Figure S2.** Performance of the CT attenuation of each bone and multivariable machine learning models to predict osteopenia/osteoporosis.

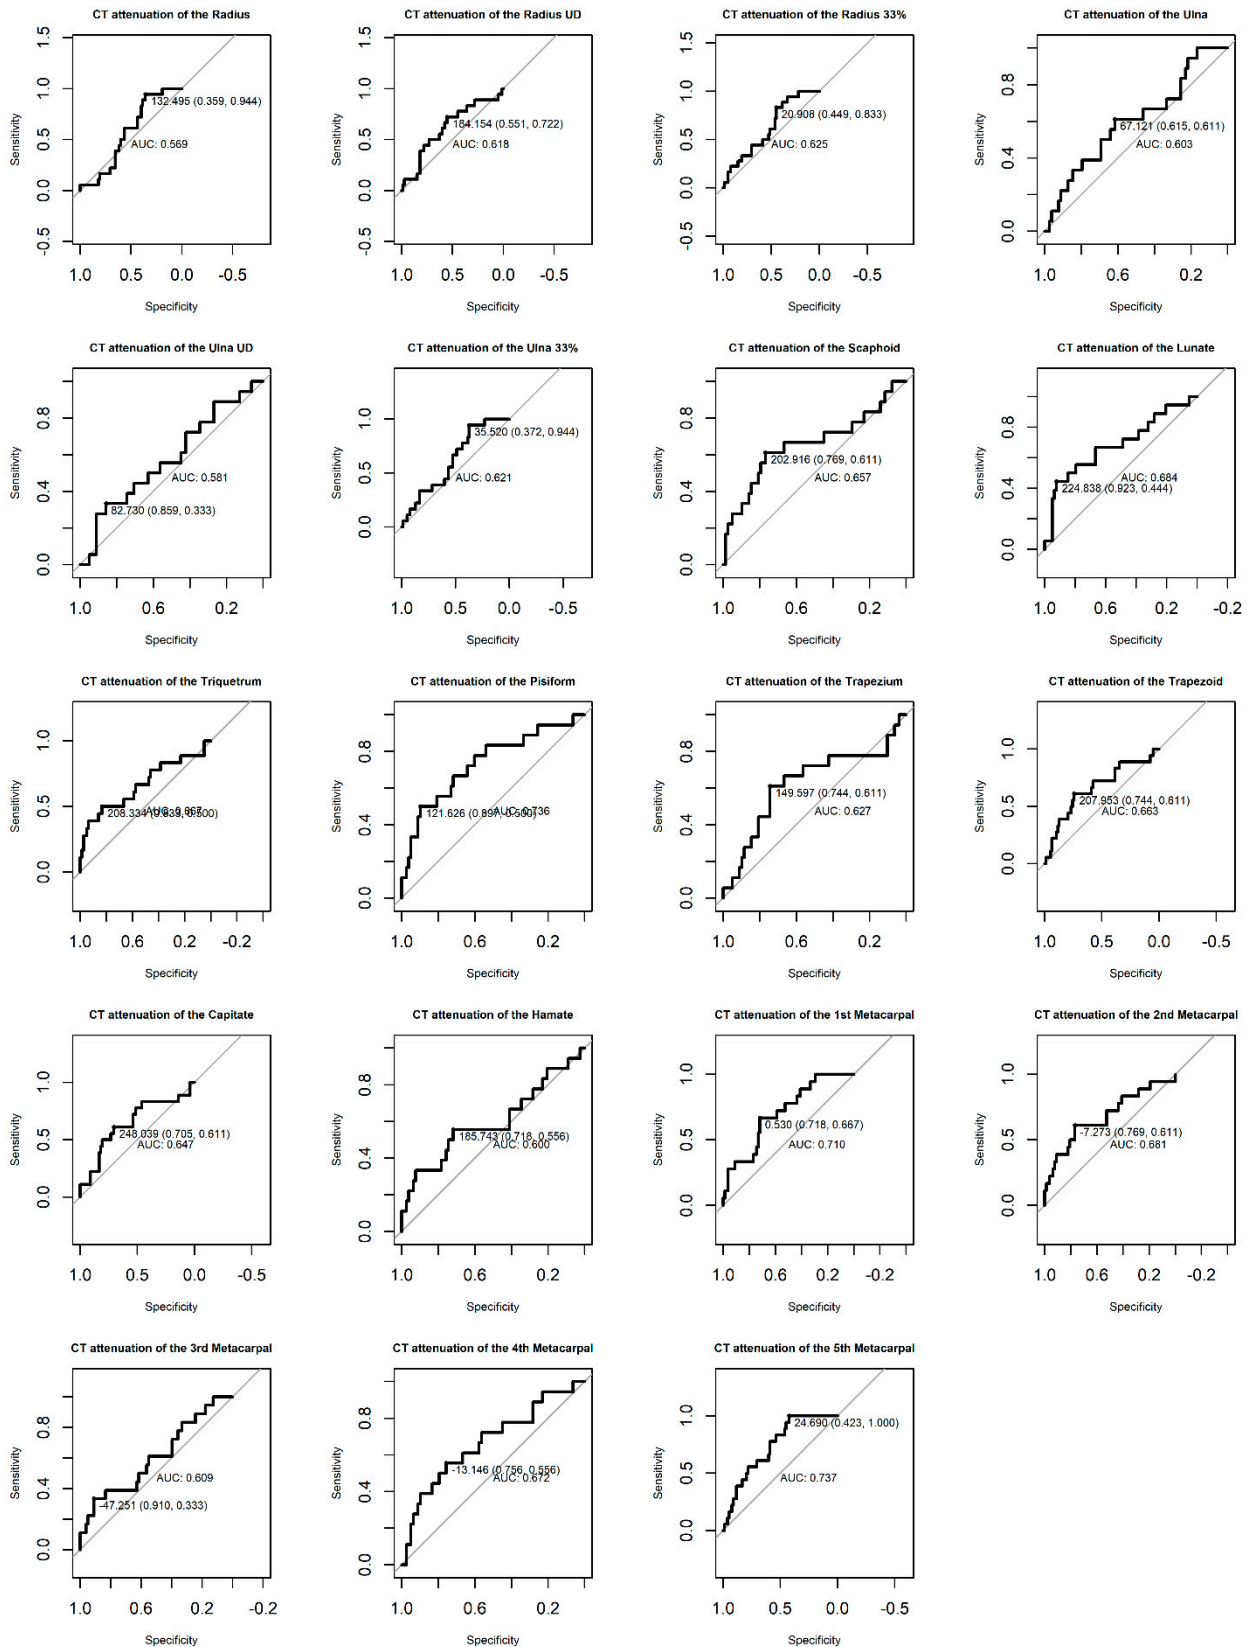

**Figure S3.** Performance of the CT attenuation of each bone and multivariable machine learning models to predict femoral neck BMD T-score  $\leq -2.5$ .

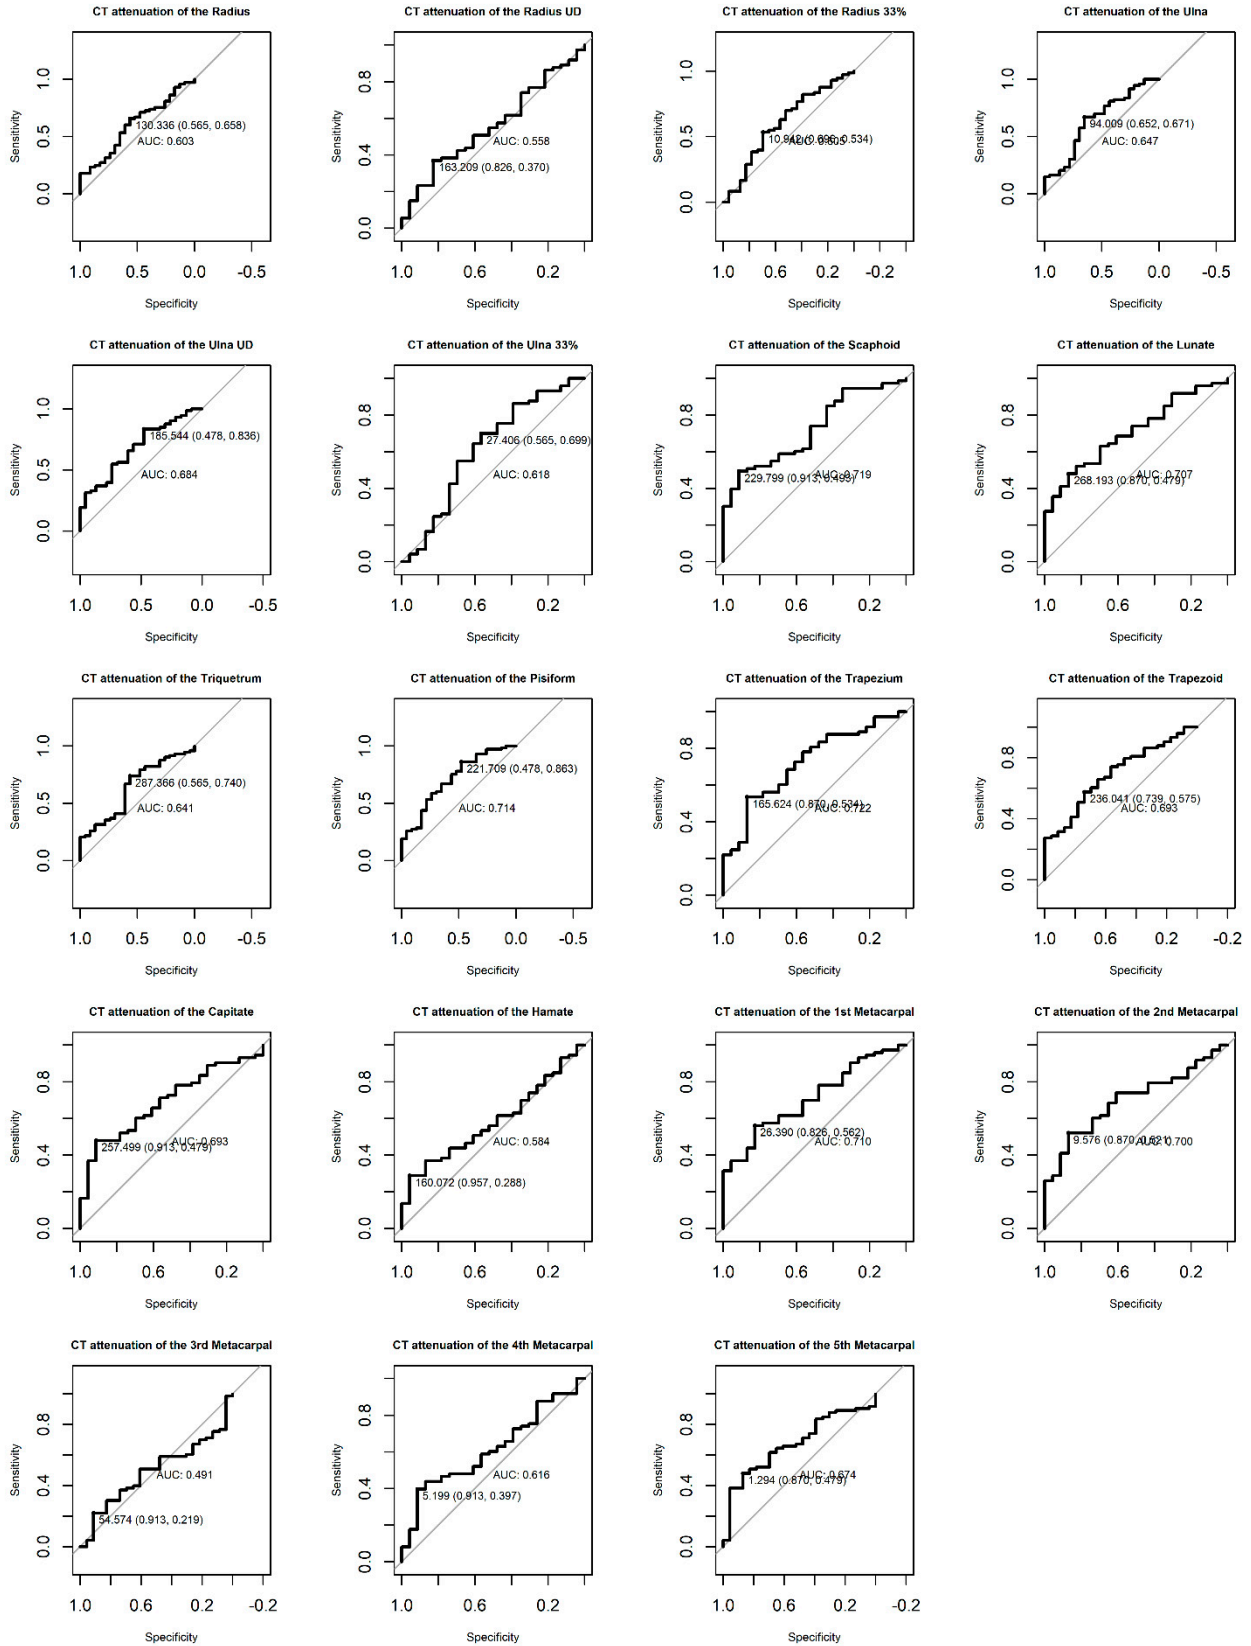

**Figure S4.** Performance of the CT attenuation of each bone and multivariable machine learning models to predict femoral neck BMD T-score <-1.
